# Supplementary material for: Anxiolytic effects of Formononetin in an inflammatory pain mouse model
Source: PubMed Central journal article supplement (PMC6454770; doi:10.1186/s13041-019-0453-4), 2019-04-08
Supplement: 13041_2019_453_MOESM1_ESM.pdf [file 13041_2019_453_MOESM1_ESM.pdf]

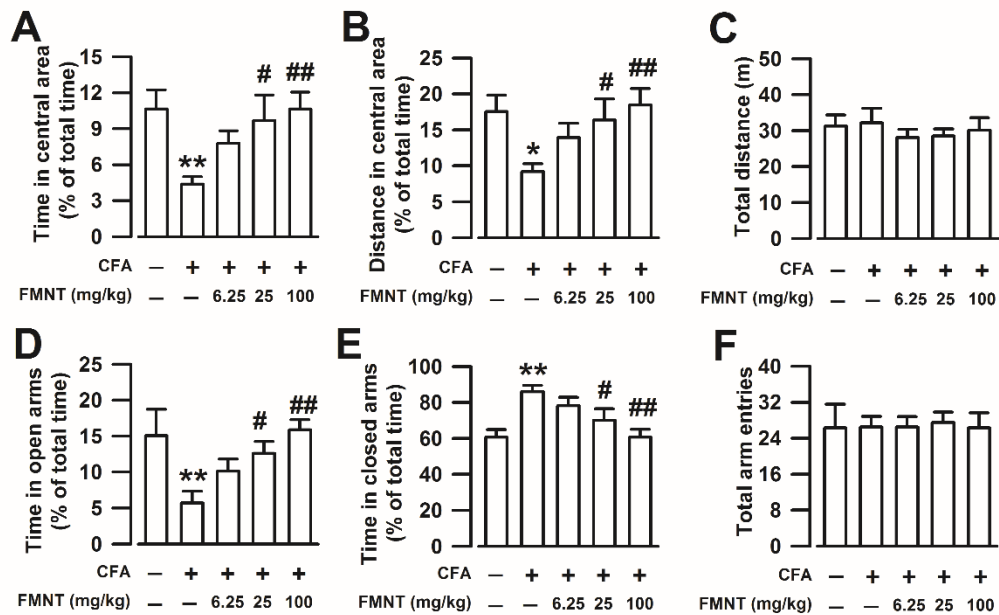

**Supplementary Fig. 1 Anxiolytic effect of FMNT was dose-dependent in mice injected with CFA**

Mice were divided into five groups: control group, CFA group, and other three groups administrated with different doses of FMNT after CFA injection. In OF test, treatment with FMNT (25 or 100 mg/kg) for 8 days significantly increased the time (a) and distance (b) spent in the central area. But there was no statistical difference between low dose group (6.25 mg/kg) and CFA-injected group. The total traveled distance was not affected (c). In EPM test, FMNT treatment increased the time spent in open arms (d) and decreased the time spent in closed arms (e) in a dose-dependent manner. The total arm entries in EPM test were comparable among these groups (f). n = 6 per group.

\* $p < 0.05$ , \*\* $p < 0.01$  vs. control; # $p < 0.05$ , ## $p < 0.01$  vs. CFA.

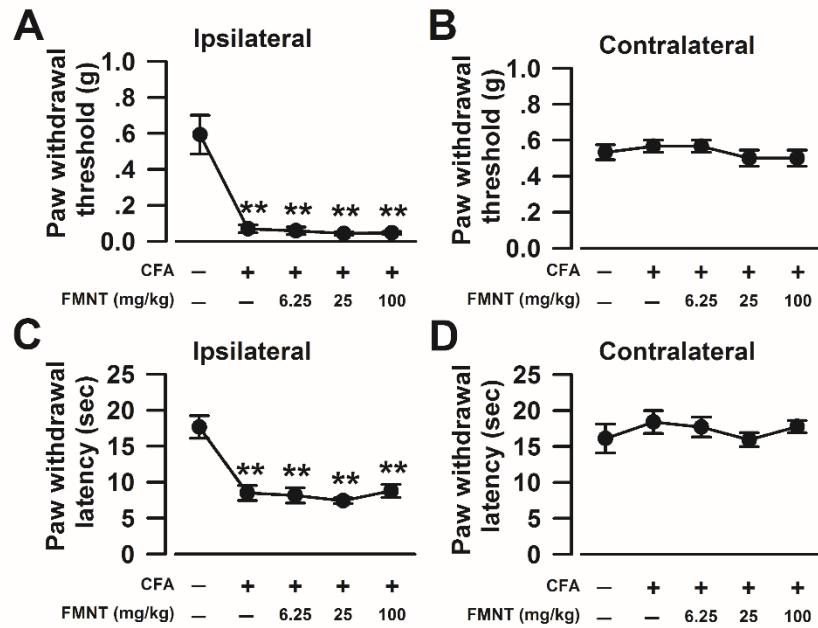

**Supplementary Fig. 2 Different dosages of FMNT had no analgesic effects in mice injected with CFA**

In Von Frey and hot plate tests, different dosages of FMNT (6.25, 25 or 100 mg/kg) did not alleviate CFA-induced mechanical allodynia (a) and thermal hyperalgesia (c) in CFA-injected hind paw (ipsilateral). But mechanical allodynia (b) and thermal hyperalgesia (d) in contralateral hind paw were not changed among these groups. n = 6 per group. \*\*p < 0.01 vs. control.
